# Supplementary material for: Whole-Genome Sequence Analysis of an Endophytic Fungus Alternaria sp. SPS-2 and Its Biosynthetic Potential of Bioactive Secondary Metabolites
Source: MDPI journal article supplement (doi:10.3390/microorganisms10091789), 2022-09-05
Supplement: s1 [file s1]

Supplementary materials for

# Whole-genome sequence analysis of an endophytic fungus *Alternaria* sp. SPS-2 and its biosynthetic potential of bioactive secondary metabolites

Jianyun Tao, Xuelian Bai, Mingyuan Zeng, Mengshi Li, Zhe Hu, Yunfen Hua\* and Huawei Zhang\*

\* Correspondence: huayf@zjut.edu.cn (Y.H.); hwzhang@zjut.edu.cn (H.Z.); Tel.: +86-571-8832091

## Contents

|                                                                                                                                                          |    |
|----------------------------------------------------------------------------------------------------------------------------------------------------------|----|
| Table S1. Genome assembly integrity assessment for strain SPS-2-----                                                                                     | 2  |
| Table S2. CAZyme profiles of strain SPS-2 and other twelve <i>Alternaria</i> strains deposited in CAZyme database-----                                   | 3  |
| Table S3. The number and type of secondary metabolite BGCs in strain SPS-2 and other selective <i>Alternaria</i> strains deposited in NCBI database----- | 4  |
| Table S4. Secondary metabolite BGCs of strain SPS-2 by antiSMASH analysis -----                                                                          | 5  |
| Table S5. BGC component for equisetin in strain SPS-2-----                                                                                               | 6  |
| Table S6. BGC component for betaenones in strain SPS-2-----                                                                                              | 7  |
| Table S7. BGC component for alternariol in strain SPS-2 -----                                                                                            | 8  |
| Table S8. BGC component for dimethylcoprogen in strain SPS-2-----                                                                                        | 9  |
| Table S9. BGC component for melanin in strain SPS-2-----                                                                                                 | 10 |

Table S1. Genome assembly integrity assessment for strain SPS-2.

| Property                   | Number | Percentage (%) |
|----------------------------|--------|----------------|
| Complete BUSCO             | 276    | 95.2           |
| Missing genes              | 10     | 3.4            |
| Total BUSCO group searched | 290    | 100            |

Table S2. CAZyme profiles of strain SPS-2 and other twelve *Alternaria* strains deposited in CAZyme database.

| Strain                        | CAZy family |     |     |     |     | PL | Total |
|-------------------------------|-------------|-----|-----|-----|-----|----|-------|
|                               | GH          | CBM | CE  | AA  | GT  |    |       |
| <i>Alternaria solani</i>      | 249         | 46  | 36  | 80  | 107 | 20 | 538   |
| <i>A. longipes</i>            | 273         | 45  | 37  | 85  | 111 | 25 | 576   |
| <i>A. fragariae</i>           | 265         | 48  | 37  | 86  | 109 | 23 | 568   |
| <i>A. destruens</i>           | 316         | 48  | 36  | 84  | 125 | 26 | 635   |
| <i>A. dauci</i>               | 252         | 40  | 37  | 97  | 111 | 22 | 559   |
| <i>A. cassiae</i>             | 240         | 42  | 34  | 83  | 104 | 22 | 525   |
| <i>A. carthami</i>            | 255         | 39  | 40  | 83  | 110 | 22 | 549   |
| <i>A. brassicicola</i> abra43 | 231         | 38  | 32  | 60  | 103 | 20 | 484   |
| <i>A. brassicae</i> J3        | 241         | 38  | 33  | 71  | 104 | 21 | 508   |
| <i>A. alternata</i> PN1       | 260         | 41  | 35  | 80  | 103 | 23 | 542   |
| <i>A. alternata</i> PN1       | 261         | 48  | 36  | 77  | 107 | 21 | 550   |
| <i>A. alternata</i> ATCC34957 | 264         | 53  | 37  | 87  | 109 | 21 | 622   |
| SPS-2                         | 257         | 15  | 118 | 146 | 83  | 25 | 644   |

Table S3. The number and type of secondary metabolite BGCs in strain SPS-2 and other selective *Alternaria* strains deposited in NCBI database.

| BGC Type       | Strain |         |       |       |       |         |           |         |         |       |
|----------------|--------|---------|-------|-------|-------|---------|-----------|---------|---------|-------|
|                | MG1    | BMP0032 | M3908 | M3903 | S3601 | BMP2799 | Ai002NY15 | BMP2768 | BMP2772 | SPS-2 |
| PKS            | 7      | 11      | 8     | 8     | 8     | 11      | 11        | 8       | 10      | 7     |
| NRPS/NRPS-like | 11     | 8       | 10    | 11    | 10    | 8       | 8         | 9       | 8       | 10    |
| Fungal-RiPP    | -      | 1       | 1     | 1     | -     | -       | 1         | 1       | 1       | 1     |
| NRPS, PKS      | 1      | 1       | 3     | 2     | 3     | 2       | 2         | -       | 2       | 0     |
| Terpene        | 4      | 3       | 5     | 4     | 3     | 3       | 3         | 3       | 4       | 4     |

Table S4. Secondary metabolite BGCs of strain SPS-2 by antiSMASH analysis.

| Gene cluster | Type         | Gene cluster position | predicted product (similarity)         |
|--------------|--------------|-----------------------|----------------------------------------|
| Region 1.1   | NRPS         | 3405290-3461377       | Unknown                                |
| Region 2.1   | Terpene      | 1004114-1024548       | Unknown                                |
| Region 3.1   | T3PKS        | 985697-1026775        | Unknown                                |
| Region 4.1   | Terpene      | 388980-408695         | Squalestatin S1 (40%)                  |
| Region 4.2   | Terpene      | 2345955-2367289       | Unknown                                |
| Region 5.1   | T1PKS        | 1087051-1131054       | Oxazolepoxidomycin A (13%)             |
| Region 5.2   | T1PKS        | 2115332-2162885       | Abscisic acid (50%)                    |
| Region 6.1   | T1PKS        | 252626-300167         | Equisetin (18%)                        |
| Region 7.1   | Fungal-RiPP  | 280898-318613         | Unknown                                |
| Region 7.2   | NRPS         | 1415890-1477928       | Cyclic hydrophobic tetrapeptide (100%) |
| Region 8.1   | T1PKS        | 160848-205614         | Melanin (100%)                         |
| Region 8.2   | T1PKS        | 918158-961487         | 1,3,6,8-tetrahydroxynaphthalene (100%) |
| Region 8.3   | NRPS         | 1667861-1723346       | Unknown                                |
| Region 9.1   | NRPS, indole | 74519-134677          | Unknown                                |
| Region 9.2   | Terpene      | 1083778-1105346       | Unknown                                |
| Region 9.3   | NRPS-like    | 1628313-1671303       | Unknown                                |
| Region 11.1  | NRPS         | 383909-428735         | Equisetin (45%)                        |
| Region 12.1  | NRPS-like    | 821562-865410         | Unknown                                |
| Region 17.1  | NRPS-like    | 305087-348950         | Unknown                                |
| Region 19.1  | NRPS         | 260997-319962         | Dimethylcoprogen (100%)                |
| Region 21.1  | NRPS-like    | 36305-79148           | Unknown                                |
| Region 21.2  | T1PKS        | 174713-214266         | Betaenone (62%)                        |

Table S5. BGC component for equisetin in strain SPS-2.

| Gene location | Description                          | MIBiG cluster | Identity | Coverage |
|---------------|--------------------------------------|---------------|----------|----------|
| ctg11_494     | equisetin synthetase                 | BGC0001255    | 55%      | 100.4%   |
| ctg11_495     | equisetin synthetase                 | BGC0001255    | 76%      | 93.6%    |
| ctg11_496     | equisetin synthetase                 | BGC0001255    | 56%      | 101.0%   |
| ctg11_497     | equisetin synthetase                 | BGC0001255    | 65%      | 100.5%   |
| ctg11_498     | equisetin synthetase                 | BGC0001255    | 65%      | 100.0%   |
| ctg11_500     | equisetin synthetase                 | BGC0001255    | 89%      | 99.1%    |
| ctg11_501     | equisetin synthetase                 | BGC0001255    | 78%      | 98.6%    |
| ctg11_502     | hypothetical protein                 | BGC0001255    | 55%      | 69.9%    |
| ctg11_505     | equisetin enoylreductase             | BGC0001255    | 70%      | 100.0%   |
| ctg11_508     | C6_transcription_factor              | BGC0001738    | 21%      | 109.6%   |
| ctg11_512     | putative fungal transcription factor | BGC0001255    | 60%      | 99.7%    |
| ctg11_513     | putative fungal transcription factor | BGC0001255    | 47%      | 39.5%    |
| ctg11_515     | putative MFS transporter             | BGC0001255    | 81%      | 81.7%    |

Table S6. BGC component for betaenones in strain SPS-2.

| Gene location | Description                               | MIBiG cluster | Identity | Coverage |
|---------------|-------------------------------------------|---------------|----------|----------|
| ctg21_238     | putative FAD binding domain protein       | BGC0001280    | 78%      | 97.8%    |
| ctg21_239     | putative FAD binding domain protein       | BGC0001280    | 76%      | 62.8%    |
| ctg21_242     | short-chain dehydrogenase                 | BGC0001280    | 85%      | 87.1%    |
| ctg21_243     | P450_monooxygenase                        | BGC0000818    | 36%      | 99.0%    |
| ctg21_244     | zinc-binding dehydrogenase family protein | BGC0001280    | 87%      | 100.0%   |
| ctg21_246     | cytochrome_P450                           | BGC0001280    | 90%      | 79.6%    |
| ctg21_248     | polyketide synthase                       | BGC0001280    | 88%      | 81.1%    |
| ctg21_249     | polyketide synthase                       | BGC0001280    | 81%      | 98.7%    |
| ctg21_250     | polyketide synthase                       | BGC0001280    | 85%      | 99.7%    |
| ctg21_251     | MFS transporter, putative                 | BGC0001280    | 52%      | 79.5%    |

Table S7. BGC component for alternariol in strain SPS-2.

| Gene location | Description                            | MIBiG cluster | Identity | Coverage |
|---------------|----------------------------------------|---------------|----------|----------|
| ctg8_1212     | PtaR3                                  | BGC0000121    | 26%      | 73.3%    |
| ctg8_1214     | monooxygenase, FAD binding domain cpaO | BGC0001563    | 36%      | 85.4%    |
| ctg8_1218     | o-methyltransferase B                  | BGC0000004    | 40%      | 73.5%    |
| ctg8_1221     | polyketide synthase                    | BGC0001284    | 85%      | 100.0%   |
| ctg8_1222     | polyketide synthase                    | BGC0001284    | 68%      | 90.4%    |
| ctg8_1223     | polyketide synthase                    | BGC0001284    | 85%      | 98.9%    |
| ctg8_1224     | polyketide synthase                    | BGC0001284    | 84%      | 96.3%    |



Table S8. BGC component for dimethylcoprogen in strain SPS-2.

| Gene location | Description                                                       | MIBiG cluster | Identity | Coverage |
|---------------|-------------------------------------------------------------------|---------------|----------|----------|
| ctg19_345     | Bcaba1                                                            | BGC00001893   | 41%      | 88.3%    |
| ctg19_355     | nonribosomal_peptide_synthetase_6                                 | BGC0001249    | 98%      | 99.8%    |
| ctg19_363     | SirA                                                              | BGC0001044    | 36%      | 96.4%    |
| ctg19_364     | multidrug resistance protein                                      | BGC0000337    | 26%      | 85.8%    |
| ctg19_365     | lysine N(6)-hydroxylase/L-ornithine-N(5)-oxygenase family protein | BGC0002001    | 29%      | 73.8%    |

Table S9. BGC component for melanin in strain SPS-2.

| Gene location | Description         | MIBiG cluster | Identity | Coverage |
|---------------|---------------------|---------------|----------|----------|
| ctg8_253      | polyketide synthase | BGC00001265   | 88%      | 99.5%    |
